# Supplementary material for: Systems Immunology Analysis Reveals the Contribution of Pulmonary and Extrapulmonary Tissues to the Immunopathogenesis of Severe COVID-19 Patients
Source: PubMed Central journal article supplement (PMC8273737; doi:10.3389/fimmu.2021.595150), 2021-06-28
Supplement: DataSheet_1.pdf [file DataSheet_1.pdf]

## *Supplementary Material*

### **1 Supplementary Tables**

**Table S1.** Accession of Gene ontology sets retrieved from AmiGO 2 for the analysis of immune cell-specific gene enrichment

| <b>Accession</b>  | <b>Term</b>                       |
|-------------------|-----------------------------------|
| <b>GO:0042119</b> | Neutrophil activation             |
| <b>GO:0030593</b> | Neutrophil chemotaxis             |
| <b>GO:0043307</b> | Eosinophil activation             |
| <b>GO:0048245</b> | Eosinophil chemotaxis             |
| <b>GO:0042117</b> | Monocyte activation               |
| <b>GO:0002548</b> | Monocyte chemotaxis               |
| <b>GO:0042116</b> | Macrophage activation             |
| <b>GO:0048246</b> | Macrophage chemotaxis             |
| <b>GO:0045576</b> | Mast cell activation              |
| <b>GO:0002551</b> | Mast cell chemotaxis              |
| <b>GO:0001773</b> | Myeloid dendritic cell activation |
| <b>GO:0002407</b> | Dendritic cell chemotaxis         |
| <b>GO:0030101</b> | NK cell activation                |
| <b>GO:0035747</b> | NK cell chemotaxis                |
| <b>GO:0051132</b> | NK T cell activation              |
| <b>GO:0042110</b> | T cell activation                 |
| <b>GO:0010818</b> | T cell Chemotaxis                 |
| <b>GO:0042113</b> | B cell activation                 |
| <b>GO:0035754</b> | B cell chemotaxis                 |

**Table S2.** Details of primers used for qRT-PCR validation of gene expression

| <b>Gene symbol</b> | <b>Forward primer 5' to 3' sequence</b> | <b>Reverse primer 5' to 3' sequence</b> | <b>Amplicon Size (bp)</b> |
|--------------------|-----------------------------------------|-----------------------------------------|---------------------------|
| <b>SOCS3</b>       | CATCTCTGTCGGAAGACCGTCA                  | GCATCGTACTGGTCCAGGAACT                  | 98                        |
| <b>TRIM56</b>      | ACCTACTGCCAAGACTGC                      | TGGTCTTGAAGGAGGCCAC                     | 112                       |
| <b>18S</b>         | TGACTCAACACGGGAAACC                     | TCGCTCCACCAACTAAGAAC                    | 114                       |

## 2 Supplementary Figures

A

| SARS-CoV-2 Infected Tissue | Number Of Upregulated Genes | Number Of Downregulated Genes |
|----------------------------|-----------------------------|-------------------------------|
| Lung                       | 3421                        | 3928                          |
| Liver                      | 4805                        | 3881                          |
| Kidney                     | 5685                        | 4848                          |
| Heart                      | 4176                        | 3312                          |

B

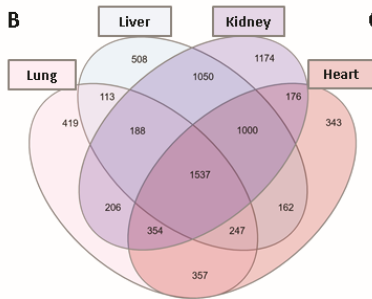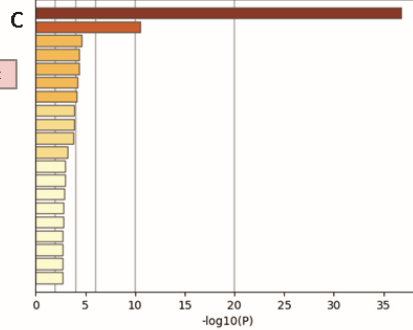

hsa05168: Herpes simplex virus 1 infection  
 GO:0050912: detection of chemical stimulus involved in sensory perception of taste  
 R-HSA-3238698: WNT ligand biogenesis and trafficking  
 GO:0003006: developmental process involved in reproduction  
 GO:0007338: single fertilization  
 GO:1903844: regulation of cellular response to transforming growth factor beta stimulus  
 GO:0048172: regulation of short-term neuronal synaptic plasticity  
 GO:0006836: neurotransmitter transport  
 GO:0060669: embryonic placenta morphogenesis  
 GO:0010466: negative regulation of peptidase activity  
 GO:0043666: regulation of phosphoprotein phosphatase activity  
 CORUM:6801: VEGFR2-51PR3-ERK12-PKC-alpha complex  
 GO:0106104: regulation of glutamate receptor clustering  
 GO:0090084: negative regulation of inclusion body assembly  
 GO:0016482: cytosolic transport  
 GO:0009792: embryo development ending in birth or egg hatching  
 R-HSA-442660: Na<sup>+</sup>/Cl<sup>-</sup> dependent neurotransmitter transporters  
 GO:0070849: response to epidermal growth factor  
 GO:0071375: cellular response to peptide hormone stimulus  
 R-HSA-6803211: TP53 Regulates Transcription of Death Receptors and Ligands

D

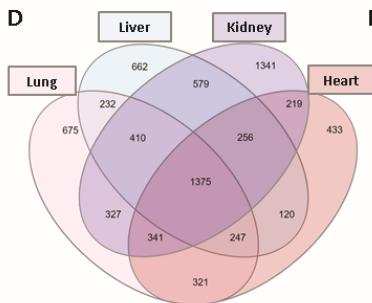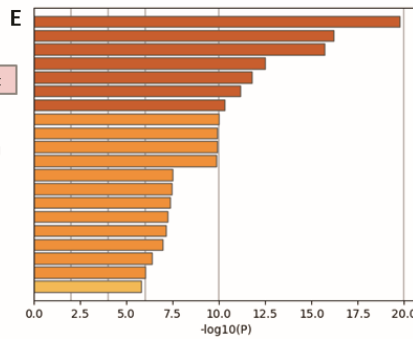

GO:0016054: organic acid catabolic process  
 GO:0032787: monocarboxylic acid metabolic process  
 GO:0007005: mitochondrion organization  
 R-HSA-72766: Translation  
 R-HSA-556833: Metabolism of lipids  
 R-HSA-9609507: Protein localization  
 R-HSA-8953854: Metabolism of RNA  
 GO:1901615: organic hydroxy compound metabolic process  
 GO:1901361: organic cyclic compound catabolic process  
 GO:0052696: flavonoid glucuronidation  
 GO:0051186: cofactor metabolic process  
 GO:0005975: carbohydrate metabolic process  
 GO:0006790: sulfur compound metabolic process  
 GO:0009060: aerobic respiration  
 GO:0016053: organic acid biosynthetic process  
 GO:0006914: autophagy  
 GO:0006720: isoprenoid metabolic process  
 GO:0006839: mitochondrial transport  
 ko00280: Valine, leucine and isoleucine degradation  
 hsa00240: Pyrimidine metabolism

**Figure S1.** (A) Count of differentially expressed genes from severe COVID-19 autopsy lung, liver, kidney, and heart tissue samples. Venn diagram representation of the overlap of significantly (B) upregulated and (D) downregulated genes amongst the four types of infected tissues. Functional clustering and pathway analysis of the commonly (C) upregulated and (E) downregulated genes across lung, liver, kidney, and heart tissues in response to SARS-CoV-2 infection.
